# Supplementary material
Source: HighWire-hosted journal article supplement (http://www.qdcxjkg.com/highwire/filestream/114018/field_highwire_adjunct_files/0/ERJ-01384-2012_Disclosures.pdf)
Supplement: ERJ-01384-2012_Disclosures.pdf [file ERJ-01384-2012_Disclosures.pdf]

**C. Conrad** has received funds for research from the Cystic Fibrosis Foundation to study *N*-acetylcysteine in CF patients. The study was completed in July 2011 and presented as an abstract/poster presentation at the North American Cystic Fibrosis Conference in 2011, and the manuscript is currently in progress.

**S. Davis** has served as a consultant or on the Advisory Board for Vertex Pharmaceuticals and Novartis Pharmaceuticals. He has also received research grants from the NIH and from the Cystic Fibrosis Foundation.
